# Supplementary material
Source: publisher site journal article supplement (https://www.dovepress.com/article/309868)
Supplement: Supplementary file 1 [file get_supplementary_file.php]

|  | **Score** | **Description** | **Example** |
| --- | --- | --- | --- |
| **STATIC** | **1** | Participant remembers a specific topic but in isolation: a fragmentary percept, unrelated to anything else. | *There was a boy.* |
| **2** | Participant remembers several unrelated perceptual experiences. | *There was a boy as well as a sound of water flow.* |
| **3** | Participant remembers several interconnected perceptual experiences. | *There were several boys sitting on the boat.* |
| **4** | Participant remembers a short but coherent dream, the parts of which seem to be immersed within a unified scene. | *There were several boys sitting on the boat in a river. It was a very sunny day.* |
| **DYNAMIC** | **5** | Participant remembers a coherent dream, in which something happens within a unified scene, i.e., one perceptual experience is replaced by another. | *There were several boys sitting on the boat in a river. It was a very sunny day. Then one of them invited me to join them and so I did – I was very happy about it.* |
| **6** | Participant remembers a long, detailed dream in which the whole scene is replaced by other scenery. | *There were several boys sitting on the boat in a river. It was a very sunny day. Then one of them invited me to join them and so I did – I was very happy about it. We navigated downstream for a while, and stopped near the riverside restaurant. The restaurant had Eastern décor with bright colours.* |
| **7** | Participant remembers a long, detailed dream in which the whole scene is replaced by other scenery more than once. | *There were several boys sitting on the boat in a river. It was a very sunny day. Then one of them invited me to join them and so I did – I was very happy about it. We navigated downstream for a while, and stopped near the riverside restaurant. The restaurant had Eastern décor with bright colors. Suddenly, one stranger in the restaurant became very large and scary. I was afraid of him and ran outside, which appeared to be a city with shining lights and busy streets [etc.].* |

**Supplementary Table 1. Orlinsky's modified scale for perceptual complexity of dreams.** Categories of perceptual complexity. Adapted from Orlinsky, D.E., 1962. Psychodynamic and cognitive correlates of dream recall. Unpublished doctoral dissertation, The University of Chicago, Chicago.

|  | **ID** | **Sex** | **Age** | **Subtype** | **Familiarity** | **Onset** | **Frequency** | **Drugs** |
| --- | --- | --- | --- | --- | --- | --- | --- | --- |
|  |  |  |  |  |  |  |  |  |
| **CHILDREN GROUP** | **C1** | M | 13 | SW | yes | 7 | 1/week | Melatonin 1 mg |
| **C2** | M | 13 | SW, ST | yes | 4 | >1/week | None |
| **C3** | M | 11 | SW | yes | 4 | >1/month | None |
| **C4** | M | 15 | CA | yes | 4 | >1/month | None |
| **C5** | M | 12 | SW, CA, ST | yes | 3 | >1/week | None |
| **C6** | F | 7 | SW | no | 7 | Everyday | None |
| **C7** | F | 12 | SW | yes | 3 | >1/week | None |
| **C8** | F | 7 | SW | yes | 5 | >1/week | None |
| **C9** | M | 15 | SW | no | 4 | >1/week | None |
| **C10** | F | 8 | ST, SW | yes | 5 | >1/month | None |
| **C11** | F | 10 | SW | yes | 5 | >1/week | None |
| **C12** | M | 6 | ST, CA | yes | 6 | Everyday | None |
| **C13** | M | 8 | SW, CA | no | 7 | >1/week | None |
| **C14** | M | 11 | SW, ST | yes | 7 | Everyday | None |
| **C15** | M | 9 | SW, CA | no | 4 | >1/week | None |
| **C16** | M | 12 | SW | no | 9 | >1/week | None |
| **C17** | M | 12 | SW, CA | yes | 6 | Everyday | None |
| **C18** | M | 10 | CA, SW | yes | 2 | Everyday | None |
| **C19** | M | 6 | ST, SW | yes | 3 | >1/week | None |
| **C20** | F | 15 | SW, CA | yes | 2 | >1/month | None |
|  |  |  |  |  |  |  |  |  |
| **ADULT GROUP** | **A1** | M | 34 | CA | yes | 4 | >1/week | None |
| **A2** | M | 28 | SW | no | 14 | >1/week | None |
| **A3** | M | 36 | SW | no | 32 | 1/month | None |
| **A4** | F | 29 | SW, ST | yes | 7 | >1/week | L-Thyroxine 75/50 mcg |
| **A5** | M | 27 | SW, ST | yes | 2 | >1/week | None |
| **A6** | F | 31 | SW, ST | yes | 10 | >1/month | None |
| **A7** | F | 27 | SW, ST | yes | 8 | 1/month | Estro-Progestinic |
| **A8** | M | 39 | SW | unknown | 6 | >1/week | Bisoprolol 2.5 mg |
| **A9** | F | 36 | CA | yes | 6 | >1/year | None |
| **A10** | M | 21 | SW, CA | no | 5 | clusters | None |
| **A11** | F | 28 | SW, ST | yes | 6 | >1/week | L-Thyroxine 100 mcg, Estro-Progestinic |
| **A12** | F | 29 | SW | yes | 4 | >1/week | None |
| **A13** | F | 25 | CA | yes | 6 | >1/week | Estro-Progestinic |
| **A14** | M | 36 | SW | yes | 20 | >1/month | None |
| **A15** | F | 31 | SW | yes | 7 | 1/month | None |
| **A16** | F | 29 | ST | yes | 9 | >1/week | Estro-Progestinic |
| **A17** | F | 23 | CA | unknown | 8 | clusters | L-Thyroxine 125 mcg, Estro-Progestinic |
| **A18** | M | 22 | SW, ST | unknown | 4 | clusters | None |
| **A19** | M | 37 | CA | yes | 6 | >1/week | L-Thyroxine 150/175 mcg |
| **A20** | M | 36 | SW, ST | no | 6 | 1/month | None |
| **A21** | F | 25 | SW, CA | yes | 8 | everyday | None |
| **A22** | F | 30 | SW | yes | 9 | 1/week | None |
| **A23** | F | 30 | CA, ST, SW | yes | 5 | 1/month | Pregabalin 200 mg |
| **A24** | F | 26 | CA, ST | yes | 7 | everyday | Estro-Progestinic |
| **A25** | F | 43 | SW, ST, CA | unknown | 6 | everyday | None |

**Supplementary Table 2. Demographics and clinical features of patients with Disorders of Arousal.**

A: Adults. C: children. F: females. M: males. CA: Confusional Arousals. ST: Sleep Terrors. SW: sleepwalking. Age and Onset expressed in years (years old). Familiarity: positive familiar history for Disorders of Arousal.

| **ID** | **CONTENT** |
| --- | --- |
| **C2** | *I dreamt about a football game, I was playing it, and at a certain point I said something to the referee.* |
|  | [His father found him kicking the radiator, he tried to interact and the patient answered to him as he was the referee]. |
|  | *I dreamt there was a secret passage but it was blocked. I was trying to get out of it, but I couldn't.* |
|  | [His mother found him into the closet, trying to open it]. |
|  | *I dreamt I was in a room similar to mine. Somehow, I knew someone locked me in the house to prank me, I was sure to be on the first floor and I was trying to go out of the window. I felt uneasy.* |
|  | [His mother stopped him trying to get out the window of the second floor]. |
| **C3** | *I dreamt I heard the doorbell ringing and I was going to open the door.* |
|  | [When I woke up, I found myself at the house entrance]. |
| **C5** | *I dreamt I was playing football - and I was excited, at the certain point the ball went out of the window (but in the dream it was like I was in a football field and the ball went out of it, although I kind of remember seeing the window), the other boys told me to go and get the ball back, so I took the door house keys, I went out the house and headed to the square in front of it, I looked for the ball under the cars parked in the square.* |
|  | [I woke up and I realized I was out the house and it was dark and cold – it was February; I started crying and for a moment I thought my parents locked me outside, but I soon after remembered the dream and realized what happened, so I went back home, the door was open. Mum uses to hide them but I know where she puts them]. |
|  | [His mother woke up because of the door noises, and found the patient at the house entrance, she tried to interact, he mumbled something and went back to sleep. She said that the evening before he actually played football with some older kids and he was very excited]. |
|  | *I dreamt I was looking for the grocery stickers.* |
|  | [His mother found him on the balcony looking for something]. |
| **C6** | *Unclear recollection of going upstairs to the grandmother’s house.* |
| **C16** | *I dreamt I was back home from school and sat to rest on the sofa.* |
|  | [The following morning, I woke up on the sofa]. |
|  | *I dreamt I went downstairs to open the door to my mum.* |
|  | [The day after the door was open, and the mum told me she slept all night]. |
| **C19** | *Unclear recollection of feeling alone or very small or scared to be tiny or getting smaller to the point of disappearing during my episodes.* |
|  | [His parents heard him frequently crying out phrases like: "Help me!", "Make me larger again!", "Dad, I'm turning into a bear!”]. |
| **A1** | *I remember I left my bed to get something (I can't remember what).* |
|  | [I woke up while walking in the house in the middle of the night, realizing the absurdity of the situation]. |
| **A2** | *I dreamt there were some rabbits jumping around the house, at a certain point I closed the widow of my room to prevent them from jumping out the window.* |
|  | [His wife saw him closing the window and looking around to invisible entities]. |
|  | *I had the feeling the floor of the kitchen was collapsing and I moved a chair quickly in a different place to avoid it to fall down.* |
|  | [The day after one of the chairs was not in its usual place]. |
| **A4** | *Recently I woke up thinking that I had to measure the blood glucose to some patients where I work. Although I recognized my room, it was like being in that dream, in the hospital, until I turned on the light.* |
|  | [When I woke up, I was standing in my room]. |
|  | *I woke up and saw a figure, like a person or shadow in the dark of my room and I thought it was real. (I could see the room as when I was wide awake but also the figure I was dreaming of). I felt scared and had the urge to push it away or escape. I actually did escape.* |
|  | [Her mother reported that she found her daughter standing in the room and when she saw her, she started screaming and pushing her away, then she started running, and finally went back to sleep covering her face with her blankets to hide from her. This is a recurrent “theme” in her episodes]. |
| **A5** | *I saw the walls of my room covered by mice teeth, and mice all over the floor, it was dreadful.* |
|  | [I woke up while trying to escape out. I often dream that my bedroom is invaded by snakes, insects or rats]. |
|  | *In dreamt I was going to ski with a friend, I was late, he was waiting me at the train station, I dressed up and I finally went out home to take the bus.* |
|  | [I woke up at the bus stop in front of my house fully equipped for a ski day in the middle of a warm night of July]. |
|  | *I dreamt there was a thief in my house and I tried to stop it.* |
|  | [I woke up alarmed, screaming for help. I often do this dream. His bedparner confirmed he recurrently screamed or yelled about thieves and leaped out of bed running away, once she asked her about a gun]. |
|  | *I woke up and I ran after a shadow without a face in my apartment, I tried many times to grasp it or see its face, without succeeding.* |
|  | [I woke up in the kitchen very upset until I realized the situation was absurd and unreal, and I went back to sleep. This is a recurrent dream]. |
|  | *I dreamt the house was on fire, I could see the fire and smoke everywhere, and I was trying to escape out, scared to death.* |
|  | [I woke up running out my room. This is quite a recurrent event]. |
|  | *I dreamt that part of my house was collapsing because of an earthquake, and I was escaping out, terrified.* |
|  | [I woke up running out the house. This is quite a recurrent event]. |
|  | *I went to the kitchen to feed the cat, I remember walking through the hallway in rather dissociate way, as I was looking to myself.* |
|  | [When I woke up the day after, the cat bowl was half full (I cleaned it the evening before and put it in a different place)]. |
|  | *I dreamt the ceiling was collapsing because I hit it with a slingshot. I can’t remember why.* |
|  | [I didn’t realize the absurdity of the thing until I woke up on sitting on the bed and looking to the ceiling, slightly worried]. |
| **A6** | *I dreamt there were snakes in my room.* |
|  | [I woke up immediately, scared, staring at the floor, and realized the absurdity of the dream. I often woke up after similar dreams about snaked in the bed or room]. |
|  | *Once I saw some colored microbes on my pillow. I was scared and I really believed in what I saw but I can’t contextualize this image now.* |
|  | [Her boyfriend told her she was yelling about some microbes]. |
|  | *I dreamt I had to look for something.* |
|  | [I did not remember what I was looking for when I woke up, it just seemed important in that very moment]. |
|  | *I dreamt there was an earthquake, I was scared, I woke up and leapt out the bed to close window of my room, and I started screaming.* |
|  | [I woke up, my bedpartner told me there was no earthquake, but I was still convinced and I looked up the news to make sure].  [Her bedpartner heard her screaming about and earthquake, and saw her shutting the window, she looked very anxious]. |
|  | *I dreamt our daughter was in the bed and she was getting crushed by my bedpartner, I remember I tried to push him away from the bed.* |
|  | [She actually yelled to her bedpartner saying something about their daughter and tried to get him out of the bed]. |
| **A7** | *I woke up with the feeling "I have to do something or I have to find something", and started looking in the drawers of my nightstand searching for things, I turned on the light at a certain point.* |
|  | [I did not fully wake up and realize the absurdity of the situation until the light was on, and I couldn’t remember what I was looking for so frantically. This is a recurrent “dream”]. |
|  | *I dreamt I was walking in my house, it was like I was within a game, I had to play at it, but I didn’t know its rules, I was confused.* |
|  | [I finally woke up while walking around the house, I took me a while to realize what happened]. |
|  | *The feeling there is something missing* |
|  | [I finally woke up while walking around the house, I took me a while to realize what happened]. |
|  | *The feeling**that I forgot to do something.* |
|  | [I finally woke up while walking around the house, I took me a while to realize what happened]. |
|  | *The feeling that someone stole or is stealing something* |
|  | [I finally woke up while sitting in my bed or walking around the house]. |
| **A8** | *The feeling of having dreamt without recollecting any specific one at the study visit.* |
| **A9** | *I was dreaming to be in Egypt on vacation and I heard the voice of my sister, she was not there, but it was like I could talk with her and it was not strange or weird at all* |
| [My sister told me I actually replied to her] |
| **A11** | *I saw an unknown person in my bed but at the same time I soon realized I was at home with my boyfriend.* |
|  | [I woke up sitting in the bed and looking at my boyfriend. Her boyfriend confirmed he woke up with her staring at him]. |
|  | *I often dream of monsters in my room (I actually saw them).* |
|  | [I usually scream and run until I wake up]. |
|  | *I was dreaming I was in a hole in the ground, I was able to see the soil but at the same time I was aware of the objects in the room, I was scared and I was not able to find the switch (she really fell in a pit of dirt when she was a kid)* |
|  | [I woke up in my room when I found the light]. |
| **A12** | *Unclear recollection of partial awareness of the absurdity of brushing her teeth looking at the mirror of her bathroom in the middle of the night just before waking up* |
| **A13** | *I put my hand on the head of my boyfriend who was sleeping on his side of the bed, I was seeing him but at the same time it was like there was an ugly and scaring animal and I had to take him far from me, it's hard to describe.* |
|  | [Her bedpartner woke up with her face on his face, he tried to remove her hand and also asked her to do so, but she insisted for a while, until she woke up]. |
|  | *I was talking to a large audience but I was aware I was in my bad. I also turned off the light because I didn't want to disturb my boyfriend (I was somehow aware he was sleeping) and I kept talking. At a certain point I switched on the light to show to the audience what I was discussing – I can’t remember the topic of the discussion right now but I remembered when I woke up.* |
|  | [Her boyfriend saw her turning on and off the light and behaving as speaking to an imaginary audience.] |
|  | *I was dreaming I was in the mountains with my nephew, I sat on the bed, I started shouting "Stop, please stop!" because I was dreaming my nephew was getting closer to a dangerous river.* |
|  | [Her bedpartner saw her moving and screaming].  [I actually went to my mountain house on holidays few days before and spent the evening before with my nephew]. |
|  | *I was seeing an unknown man in my house, at the end of the stairs, he wanted to have a shower in my house, after a brief discussion with him, I went to my closet and took a towel.* |
|  | [When I was closing the closet, I gradually woke up and realized the absurdity of the situation, so I went back to sleep]. |
|  | *I have been patting the blanket for a long while, I was seeing a dog but I was partially aware it was just blanket over by boyfriend.* |
|  | [I did not remember if I became aware the dog was my boyfriend only at a certain point.]  [Her boyfriend saw her looking for a dog in the bed and patting the blanket over his hip]. |
| **A15** | *I was looking for the cat and went to the window to check whether the cat was outside.* |
|  | [I woke up in front of the window]. |
|  | *I was looking for someone – I can’t remember who - in the house.* |
|  | [At a certain point I woke up while walking around and realized it was dark and the absurdity of the situation]. |
| **A19** | *I had the feeling I was dreaming before about ants but I can’t remember exactly what.* |
|  | [I woke up to check whether there were ants in the room or not]. |
| **A20** | *Once I was trying to prevent a bicycle to fall down on the bed, I remember I could touch the ceiling of my room and that at the same time I could see a bicycle.* |
|  | [I woke up standing on the bed with my arms raised]. |
|  | *Once I called my wife, I needed her help urgently to make some cyclists pass through the window in the room, I am not sure but I thought it was something perfectly normal.* |
|  | [His wife was woken up by the patient asking her to help him to give directions to some cyclists, he seemed distressed]. |
|  | *I dreamt (and actually saw) spiders and ants in the bed.* |
|  | [I woke up anxious, realizing there were no spiders or ants in the bed. This is a recurrent dream]. |
|  | *I dreamt to save a girl who was falling down and I actually throw myself on the floor, I distinctly remember the image of this girl falling down, I can’t say where I was in the dream.* |
|  | [I woke up after crashing on the floor, my wife took me to the emergency room.] |
| **A21** | *I saw some insects with vivid and extreme details in my bed.* |
|  | [I woke up and of course the was nothing there, but my heart was pounding]. |
|  | *I saw a patient in the bed. I was very frightened.* |
|  | [I woke up and I was sitting on the bed staring at my boyfriend. I actually had a traumatic episode with a patient at work few days before]. |
|  | *I dreamt there were thieves in my house, I was scared, but I silently went out of my room to check.* |
|  | [I woke up while walking, there was nobody in the house]. |
| **A22** | *I dreamt of a colleague of mine (who spent the day before in my house), for some reasons I had to give him a pillow, so I went downstairs to take the pillow, and I opened the closet.* |
|  | [I woke up downstairs in front of the closet with the pillow in my hands]. |
|  | *I remember I was doing something with some monitors, probably at work, but nothing more.* |
|  | [Her bedpartner woke her up and I found myself sitting in the bed]. |
|  | *I was thinking I was late for work. I can’t remember any other detail.* |
|  | [I woke up fully dressed in the bathroom, it was the middle of the night]. |
| **A23** | *I remember I saw some spiders falling from the ceiling of my room, it was scaring, I hate spiders, and I jumped out of my bed.* |
|  | [I woke up out of my bed and there was nothing on my bed or on the ceiling, I realized it was just a dream. This is a recurrent dream]. |
|  | *I remember I had a good reason for looking at the nightstand but I could not remember any more.* |
|  | [I woke up sitting on my bed and staring at the night stand]. |
| **A25** | *I dreamt that the closet in front of the bed was falling down and I was trying to prevent it from crashing on me and my husband, I remember having my arms stretched up and while I was putting all my effort to resist, someone tried to stop me, so I got even more distressed.* |
|  | [The husband was trying to stop me, the patient yelled him to stop doing that and I was getting nervous before waking up]. |

**Supplementary Table 3. Transcription of mental contents recalled by patients during the clinical interview.** C = Children, A = Adults. In gray the reports in which the subject stated he/she had the feeling of dreaming something, without any specific associated recollection.

**
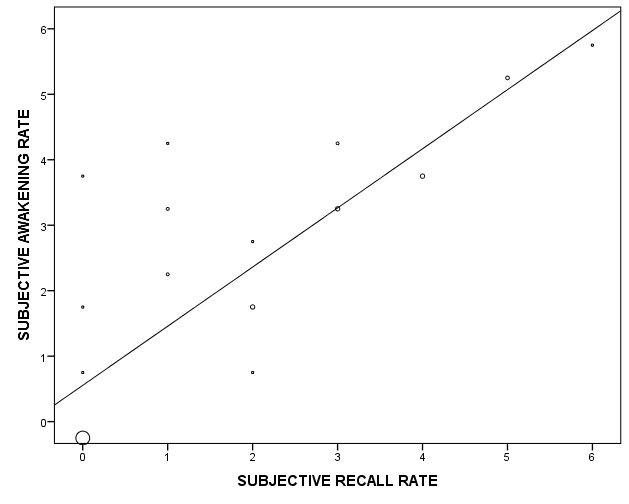
**

**Supplementary Figure 1. Scatterplot showing the correlation between the subjective recall rate and the subjective awakening rate.** The dot size is proportional to the number of subjects falling on its specific coordinates. Adults and children are pooled together. There is a strong, positive partial correlation between the subjective content recall rate (1.6 ± 1.8, n = 45) and the subjective awakening rate (2.0 ± 1.9, n = 45) after episodes, which was statistically significant: r(42) = 0.82, p < 0.001. Zero-order correlations showed a similar degree of correlation between these two variables: r(43) = 0.88, n = 25, p < 0.001, indicating that age had a very little influence controlling for their relationship.
